# Supplementary material
Source: PubMed Central journal article supplement (PMC4963513)
Supplement: JCM.00960-16_zjm999095108so1.pdf [file JCM.00960-16_zjm999095108so1.pdf]

**Table S1.** Identification, origin and GenBank accession numbers of the sequences of the isolates included in this study.

| Species                | UTHSCSA               | Source            | State   | GenBank accession no. |                  |
|------------------------|-----------------------|-------------------|---------|-----------------------|------------------|
|                        | De-identified #       |                   |         | ITS                   | $\beta$ -tubulin |
| <i>P. rubens</i>       | DI16-34               | Unknown           | FL      | LT558856              | LT558974         |
|                        | DI16-35               | chicken cecal     | TX      | LT558857              | LT558975         |
|                        | DI16-36               | BAL               | CA      | LT558858              | LT558976         |
|                        | DI16-37               | Brain tissue      | PA      | LT558859              | LT558977         |
|                        | DI16-38               | Cornea            | MD      | LT558860              | LT558978         |
|                        | DI16-39               | Nasal             | NC      | LT558861              | LT558979         |
|                        | DI16-40               | Toe               | TX      | LT558862              | LT558980         |
|                        | DI16-41               | Sputum            | VA      | LT558863              | LT558981         |
|                        | DI16-42               | Cornea            | TX      | LT558864              | LT558982         |
|                        | DI16-43               | Sinus             | TN      | LT558865              | LT558983         |
|                        | DI16-44               | Pericardial fluid | CA      | LT558866              | LT558984         |
|                        | DI16-45               | Lung Bx           | PA      | LT558867              | LT558985         |
|                        | DI16-46               | Pleural           | MN      | LT558868              | LT558986         |
|                        | DI16-47               | Air valve         | CA      | LT558869              | LT558987         |
|                        | DI16-48               | Nasal             | CA      | LT558870              | LT558988         |
|                        | DI16-49               | Catheter          | TX      | LT558871              | LT558989         |
|                        | DI16-50               | Sputum            | WA      | LT558872              | LT558990         |
|                        | DI16-51               | BAL               | IL      | LT558873              | LT558991         |
|                        | DI16-52               | BAL               | CA      | LT558874              | LT558992         |
|                        | <i>P. chrysogenum</i> | DI16-53           | Sinus   | MN                    | LT558875         |
| DI16-54                |                       | BAL               | MA      | LT558876              | LT558994         |
| <i>Penicillium</i> sp. | DI16-55               | Bone Marrow       | MN      | LT558877              | LT558995         |
|                        | DI16-56               | BAL               | CA      | LT558878              | LT558996         |
|                        | DI16-57               | Blood             | TX      | LT558879              | LT558997         |
|                        | DI16-58               | BAL               | TX      | LT558880              | LT558998         |
|                        | DI16-59               | BAL               | MN      | LT558881              | LT558999         |
|                        | DI16-60               | Sputum            | MN      | LT558882              | LT559000         |
|                        | DI16-61               | BAL               | MN      | LT558883              | LT559001         |
| <i>P. citrinum</i>     | DI16-62               | BAL               | AZ      | LT558884              | LT559002         |
|                        | DI16-63               | Sinus             | TX      | LT558885              | LT559003         |
|                        | DI16-64               | Gastric dolphin   | Bahamas | LT558886              | LT559004         |
|                        | DI16-65               | Sinus             | WA      | LT558887              | LT559005         |
|                        | DI16-66               | Lung Bx           | WI      | LT558888              | LT559006         |

|                          |          |                     |    |          |          |
|--------------------------|----------|---------------------|----|----------|----------|
|                          | DI16-67  | BAL                 | MN | LT558889 | LT559007 |
|                          | DI16-68  | Sinus               | TN | LT558890 | LT559008 |
|                          | DI16-69  | Eye                 | NY | LT558891 | LT559009 |
|                          | DI16-70  | Sinus               | WA | LT558892 | LT559010 |
|                          | DI16-71  | Sputum              | VA | LT558893 | LT559011 |
|                          | DI16-72  | BAL                 | UT | LT558894 | LT559012 |
|                          | DI16-73  | Lung Bx             | MN | LT558895 | LT559013 |
|                          | DI16-74  | Urine               | TX | LT558896 | LT559014 |
|                          | DI16-75  | BAL                 | FL | LT558897 | LT559015 |
| <i>P. sumatrense</i>     | DI16-76  | Pulmonary<br>nodule | WI | LT558898 | LT559016 |
| <i>P. pancosmium</i>     | DI16-77  | Peritoneal<br>fluid | OK | LT558899 | LT559017 |
| <i>P. roseopurpureum</i> | DI16-78  | Nasal Bx<br>Canine  | CA | LT558900 | LT559018 |
| <i>P. roqueforti</i>     | DI16-79  | Sinus               | TN | LT558901 | LT559019 |
|                          | DI16-80  | Hip                 | MN | LT558902 | LT559020 |
|                          | DI16-81  | Sputum              | WA | LT558903 | LT559021 |
| <i>P. adamezioides</i>   | DI16-82  | Cornea              | TX | LT558904 | LT559022 |
| <i>P. coprophilum</i>    | DI16-83  | Sinus               | TN | LT558905 | LT559023 |
| <i>P. decumbens</i>      | DI16-84  | BAL                 | TX | LT558906 | LT559024 |
| <i>P. rubefaciens</i>    | DI16-85  | BAL                 | AZ | LT558907 | LT559025 |
| <i>P. citreonigrum</i>   | DI16-86  | BAL                 | IL | LT558908 | LT559026 |
|                          | DI16-87  | Sputum              | VA | LT558909 | LT559027 |
| <i>P. brevicompactum</i> | DI16-88  | Bone lesion         | TX | LT558910 | LT559028 |
|                          | DI16-89  | BAL                 | IL | LT558911 | LT559029 |
| <i>P. rudallense</i>     | DI16-90  | BAL                 | MA | LT558912 | LT559030 |
| <i>P. frequentans</i>    | DI16-91  | BAL                 | CA | LT558913 | LT559031 |
| <i>P. glabrum</i>        | DI16-92  | Urine               | UT | LT558914 | LT559032 |
|                          | DI16-93  | Finger tissue       | NY | LT558915 | LT559033 |
|                          | DI16-94  | Hip fluid           | MI | LT558916 | LT559034 |
|                          | DI16-95  | Epidural<br>abscess | MN | LT558917 | LT559035 |
|                          | DI16-96  | Tracheal<br>canine  | CA | LT558918 | LT559036 |
| <i>P. echinulatum</i>    | DI16-97  | Sinus               | TN | LT558919 | LT559037 |
| <i>P. crustosum</i>      | DI16-98  | BAL                 | MT | LT558920 | LT559038 |
|                          | DI16-99  | Lymph node          | VA | LT558921 | LT559039 |
|                          | DI16-100 | Stool               | CO | LT558922 | LT559040 |
|                          | DI16-101 | Sputum              | TN | LT558923 | LT559041 |
| <i>P. polonicum</i>      | DI16-102 | Unknown             | WA | LT558924 | LT559042 |

|                        |          |                   |        |          |          |
|------------------------|----------|-------------------|--------|----------|----------|
|                        | DI16-103 | Sinus             | TN     | LT558925 | LT559043 |
|                        | DI16-104 | BAL               | WA     | LT558926 | LT559044 |
|                        | DI16-105 | Blood             | HI     | LT558927 | LT559045 |
| <i>P. allii</i>        | DI16-106 | Sinus             | MA     | LT558928 | LT559046 |
| <i>P. palitans</i>     | DI16-107 | Unknown           | WA     | LT558929 | LT559047 |
| <i>P. oxalicum</i>     | DI16-108 | BAL               | UT     | LT558930 | LT559048 |
|                        | DI16-109 | Sinus             | MN     | LT558931 | LT559049 |
|                        | DI16-110 | BAL               | TX     | LT558932 | LT559050 |
|                        | DI16-111 | Sputum            | TX     | LT558933 | LT559051 |
|                        | DI16-112 | BAL               | Canada | LT558934 | LT559052 |
|                        | DI16-113 | Blood             | MO     | LT558935 | -        |
|                        | DI16-114 | BAL               | MN     | LT558936 | LT559053 |
| <i>P. rolfsii</i>      | DI16-115 | Bronchus          | TX     | LT558937 | LT559054 |
|                        | DI16-116 | BAL               | CA     | LT558938 | LT559055 |
| <i>P. brasilianum</i>  | DI16-117 | Sputum            | CA     | LT558939 | LT559056 |
| <i>P. singorense</i>   | DI16-118 | BAL               | TX     | LT558940 | LT559057 |
| <i>T. columbinus</i>   | DI16-119 | Tracheal aspirate | NY     | LT558941 | LT559058 |
| <i>T. atroroseus</i>   | DI16-120 | BAL               | UT     | LT558942 | LT559059 |
| <i>T. diversus</i>     | DI16-121 | Lung Bx           | UT     | LT558943 | LT559060 |
| <i>T. purpurogenus</i> | DI16-122 | BAL               | WI     | LT558944 | LT559061 |
|                        | DI16-123 | BAL               | TX     | LT558945 | LT559062 |
|                        | DI16-124 | Lung Bx           | WI     | LT558946 | LT559063 |
|                        | DI16-125 | Sputum            | OH     | LT558947 | LT559064 |
|                        | DI16-126 | BAL               | MN     | LT558948 | LT559065 |
| <i>T. aurantiacus</i>  | DI16-127 | Scalp wound       | MN     | LT558949 | LT559066 |
|                        | DI16-128 | Lung Canine       | CA     | LT558950 | LT559067 |
| <i>T. amestolkiae</i>  | DI16-129 | BAL               | UT     | LT558951 | LT559068 |
|                        | DI16-130 | Lung Bx           | WI     | LT558952 | LT559069 |
|                        | DI16-131 | Sputum            | WA     | LT558953 | LT559070 |
|                        | DI16-132 | BAL               | MN     | LT558954 | LT559071 |
|                        | DI16-133 | BAL               | UT     | LT558955 | LT559072 |
|                        | DI16-134 | BAL               | UT     | LT558956 | LT559073 |
|                        | DI16-135 | BAL               | PA     | LT558957 | LT559074 |
| <i>T. ruber</i>        | DI16-136 | Sputum            | MN     | LT558958 | LT559075 |
|                        | DI16-137 | Finger            | WA     | LT558959 | LT559076 |
| <i>T. cnidii</i>       | DI16-138 | BAL               | WV     | LT558960 | LT559077 |
| <i>T. funiculosus</i>  | DI16-139 | BAL               | TX     | LT558961 | LT559078 |

|                            |          |                       |    |          |          |
|----------------------------|----------|-----------------------|----|----------|----------|
| <i>T. pinophilus</i>       | DI16-140 | BAL                   | MT | LT558962 | LT559079 |
|                            | DI16-141 | BAL                   | MT | LT558963 | LT559080 |
|                            | DI16-142 | BAL                   | AZ | LT558964 | LT559081 |
| <i>Talaromyces</i> sp. I   | DI16-143 | BAL                   | UT | LT558965 | LT559082 |
| <i>Talaromyces</i> sp. II  | DI16-144 | Ear                   | MN | LT558966 | LT559083 |
| <i>Talaromyces</i> sp. III | DI16-145 | Joint fluid<br>animal | GA | LT558967 | LT559084 |
| <i>Talaromyces</i> sp. IV  | DI16-146 | BAL                   | TX | LT558968 | LT559085 |
|                            | DI16-147 | BAL                   | UT | LT558969 | LT559086 |
| <i>Talaromyces</i> sp. V   | DI16-148 | BAL                   | OH | LT558970 | LT559087 |
| <i>Talaromyces</i> sp. VI  | DI16-149 | BAL                   | WA | LT558971 | LT559088 |
| <i>R. argillacea</i>       | DI16-150 | Lung Bx               | TN | LT558972 | LT559089 |
| <i>R. eburnea</i>          | DI16-151 | Lung Bx               | NY | LT558973 | LT559090 |

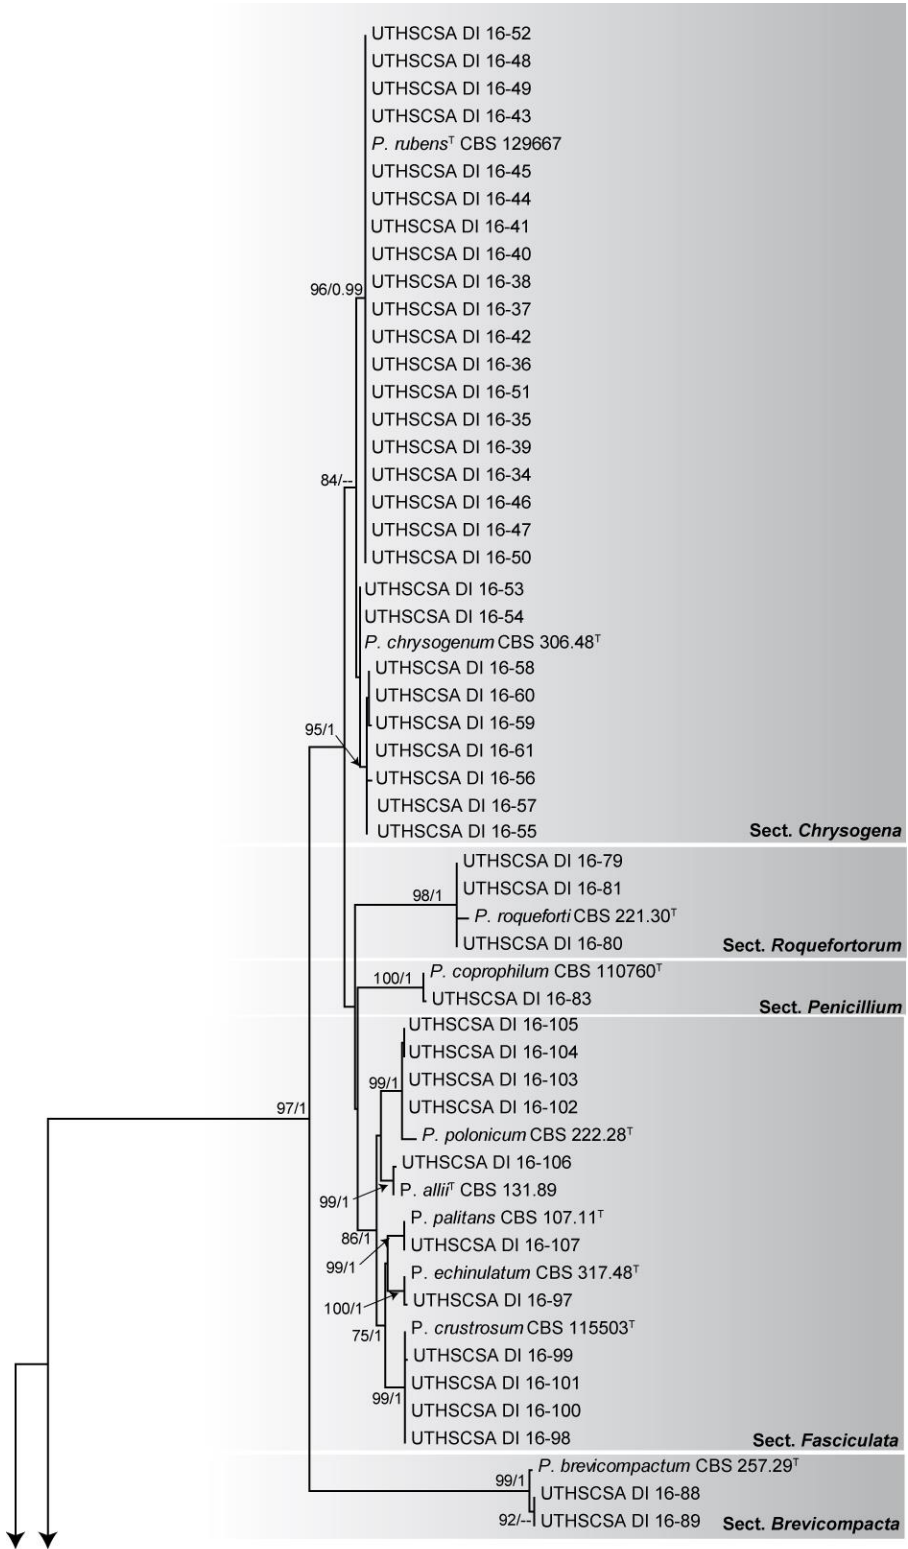

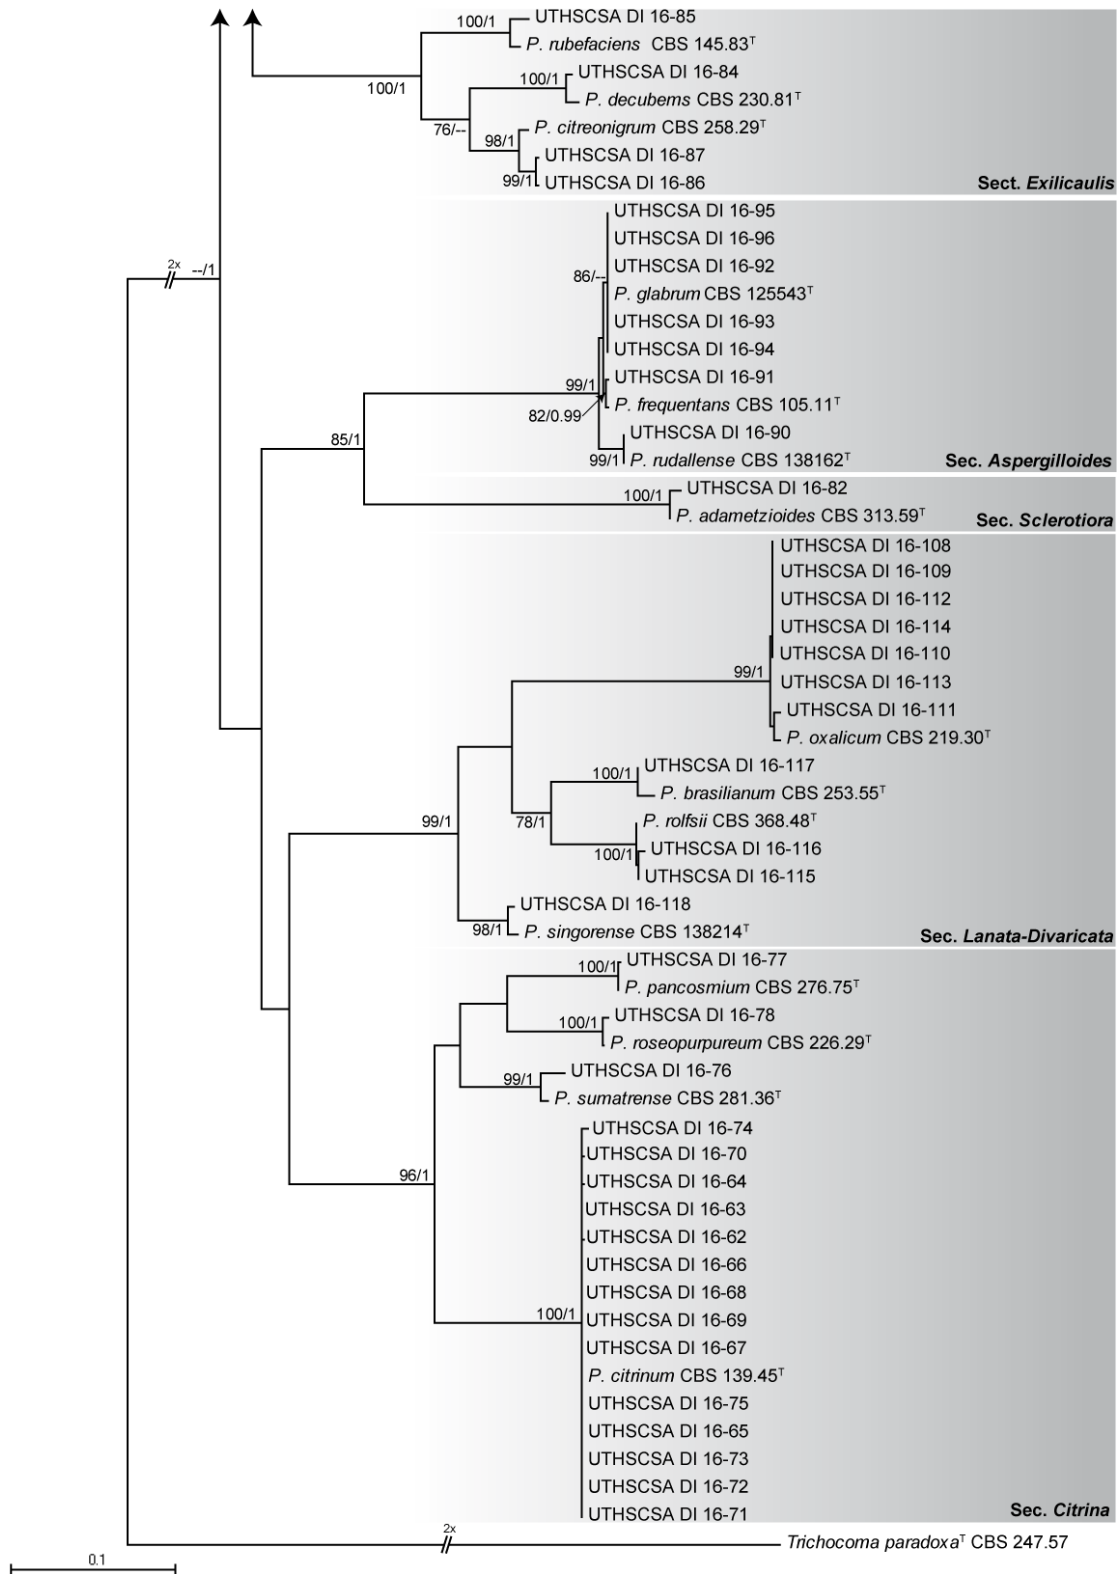

**Figure S1.** Phylogenetic tree of *Penicillium* genus, using Maximum-likelihood (ML) and Bayesian inference (BI), tree constructed with the combination of ITS (521 bp) and  $\beta$ -

tubulin (398 bp) sequence data. Support values are above branches, and represent bootstrap values >70% for ML/posterior probabilities >0.95 for BI. The phylogenetic tree was rooted with *Trichocoma paradoxa* CBS 247.57. T: type strain.

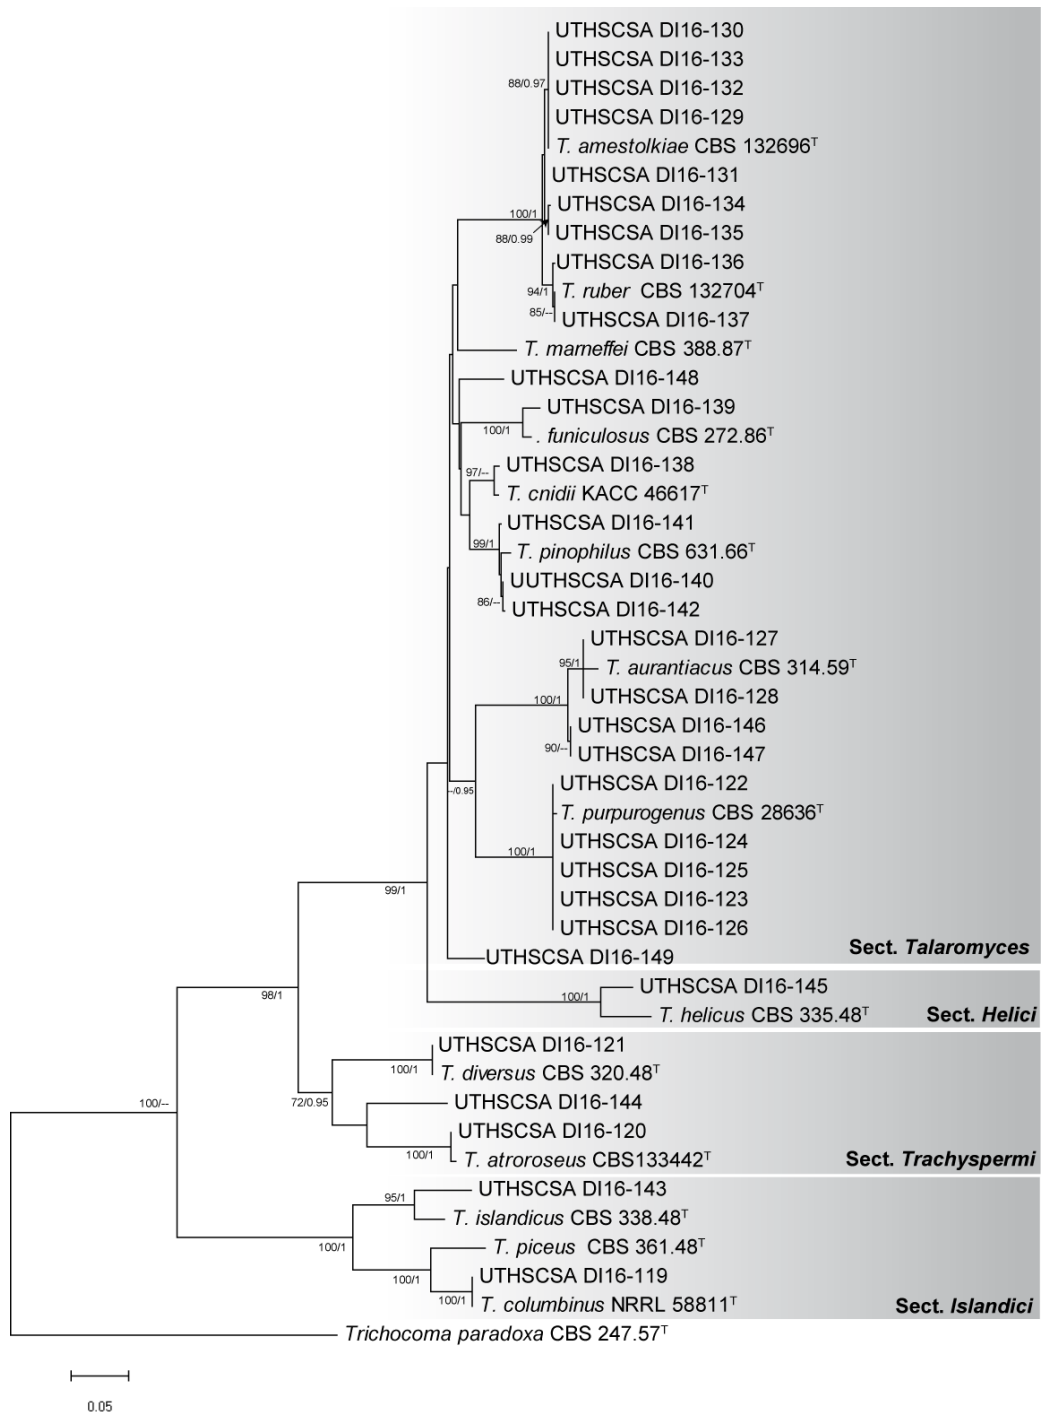

**Figure S2.** Phylogenetic tree of *Talaromyces* genus, using Maximum-likelihood (ML) and Bayesian inference (BI), tree constructed with the combination of ITS (474 bp) and  $\beta$ -tubulin (373 bp) sequence data. Support values are above branches, and represent bootstrap values >70% for ML/posterior probabilities >0.95 for BI. The phylogenetic tree was rooted with *Trichocoma paradoxa* CBS 247.57. T: type strain.



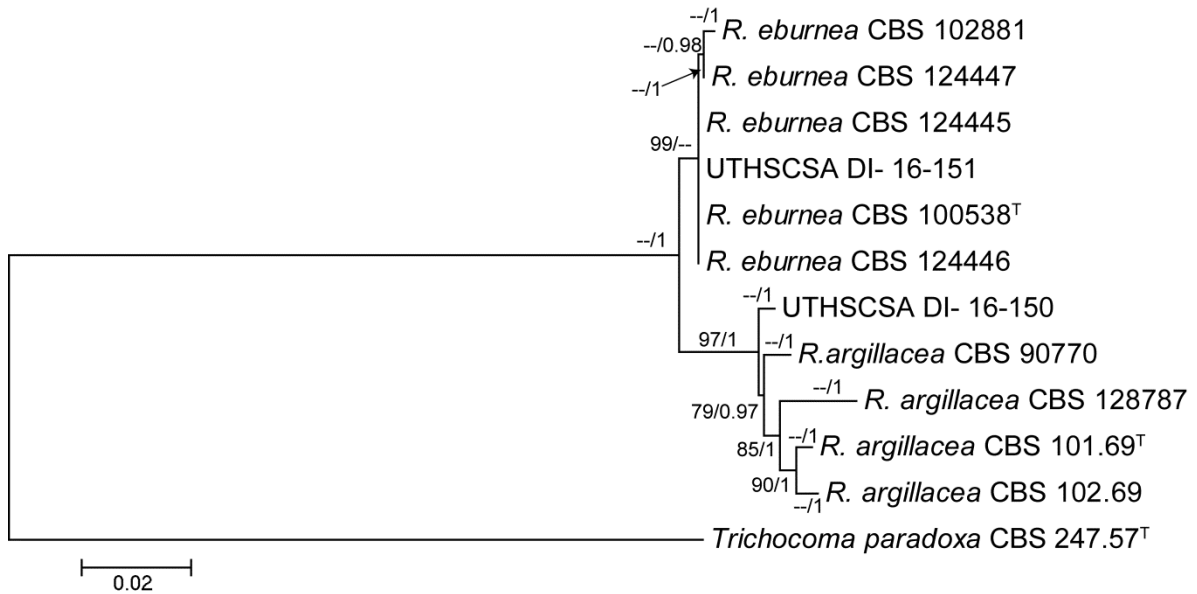

**Figure S3.** Phylogenetic tree of *Rasamsonia* genus, using Maximum-likelihood (ML) and Bayesian inference (BI), tree constructed with the combination of ITS (599 bp) and  $\beta$ -tubulin (479 bp) sequence data. Support values are above branches, and represent bootstrap values >70% for ML/posterior probabilities >0.95 for BI. The phylogenetic tree was rooted with *Trichocoma paradoxa* CBS 247.57. T: type strain.
